# Supplementary material for: Switching of polymerization activity of cinnamoyl-α-cyclodextrin
Source: Royal Society of Chemistry journal article supplement (doi:10.1039/b818241h), 2009-01-01
Supplement: b818241h.pdf [file b818241h.pdf]

## Electronic Supplementary Information

# Switching of Polymerization Activity of Cinnamoyl- $\alpha$ - Cyclodextrin

*Motofumi Osaki, Yoshinori Takashima, Hiroyasu Yamaguchi and Akira Harada\**

Department of Macromolecular Science, Graduate School of Science, Osaka University, Toyonaka,  
Osaka 560-0043, Japan.

harada@chem.sci.osaka-u.ac.jp

\* Corresponding author. Telephone +81-6-6850-5445; Fax +81-6-6850-5445; E-mail  
harada@chem.sci.osaka-u.ac.jp.

- S3 **Figure S1.** 500 MHz  $^1\text{H}$  NMR spectrum of 2-*trans*-CiO- $\alpha$ -CD (upper) and the product obtained from the polymerization of  $\delta$ -VL initiated by 2-*trans*-CiO- $\alpha$ -CD in DMSO- $d_6$ .
- S4 **Figure S2.** MALDI-TOF mass spectrum of the product obtained from the polymerization of  $\delta$ -VL initiated by 2-*trans*-CiO- $\alpha$ -CD.

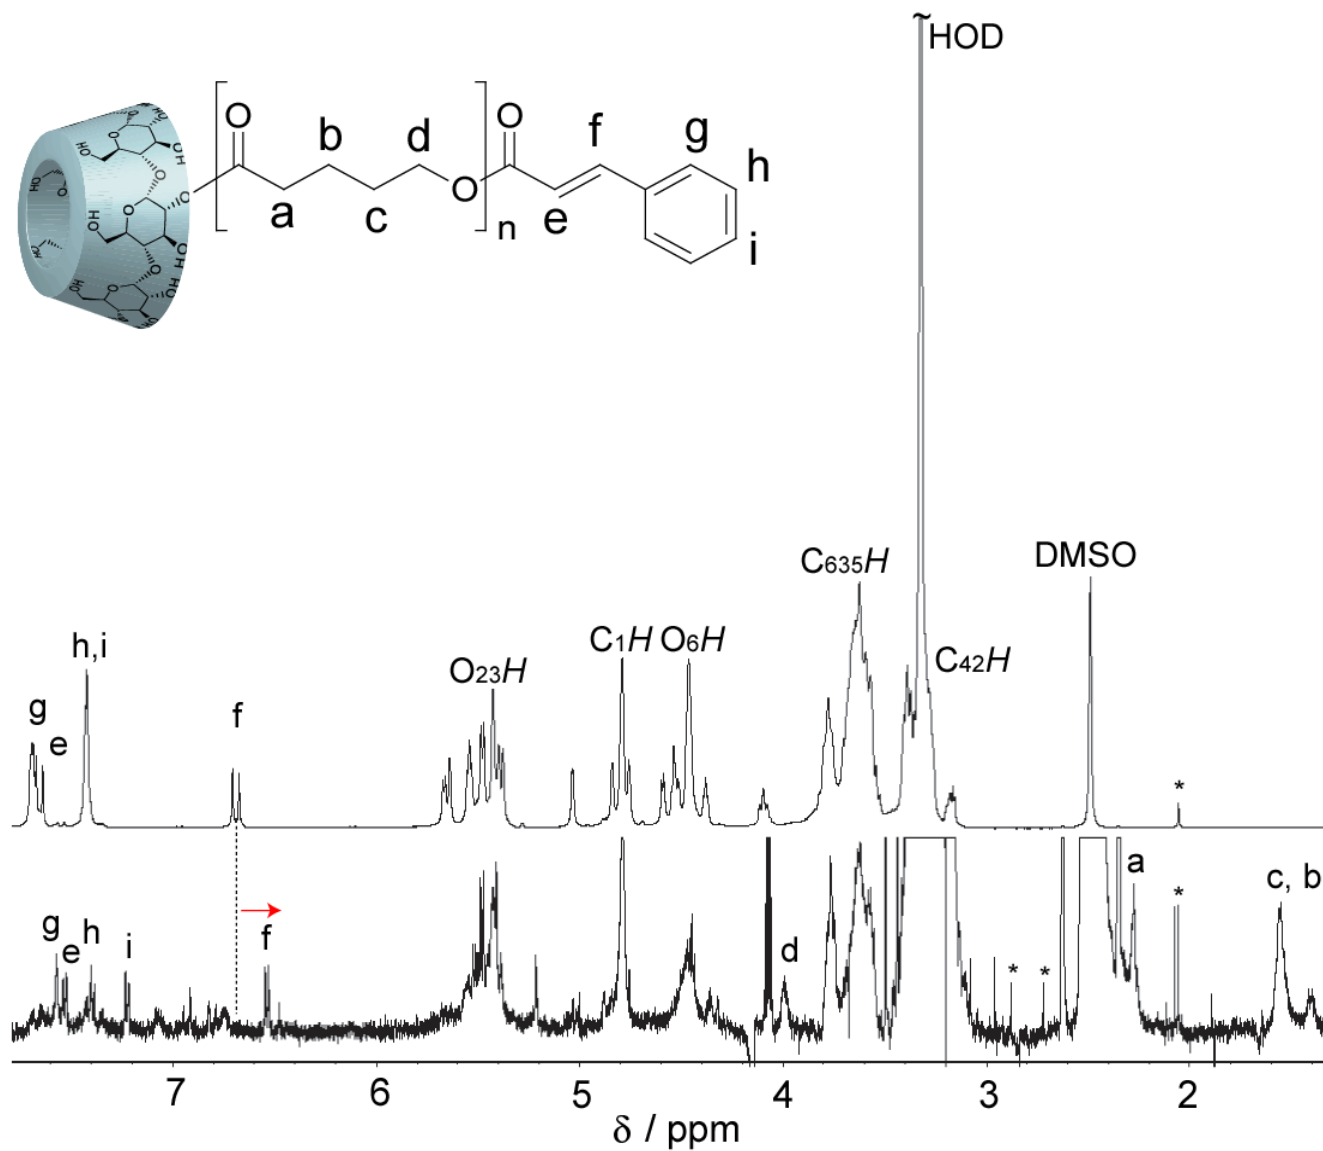

**Figure S1.** 500 MHz  $^1\text{H}$  NMR spectrum of 2-*trans*-CiO- $\alpha$ -CD (upper) and the product obtained from the polymerization of  $\delta$ -VL initiated by 2-*trans*-CiO- $\alpha$ -CD in DMSO-*d*<sub>6</sub>. (\*: solvent)

The spectrum of the product showed peaks derived from 2-*trans*-CiO- $\alpha$ -CD and poly( $\delta$ -VL). The peaks of cinnamoyl group were shifted to up-field, indicating that poly( $\delta$ -VL) was inserted the ester bond between cinnamoyl group and  $\alpha$ -CD moiety.

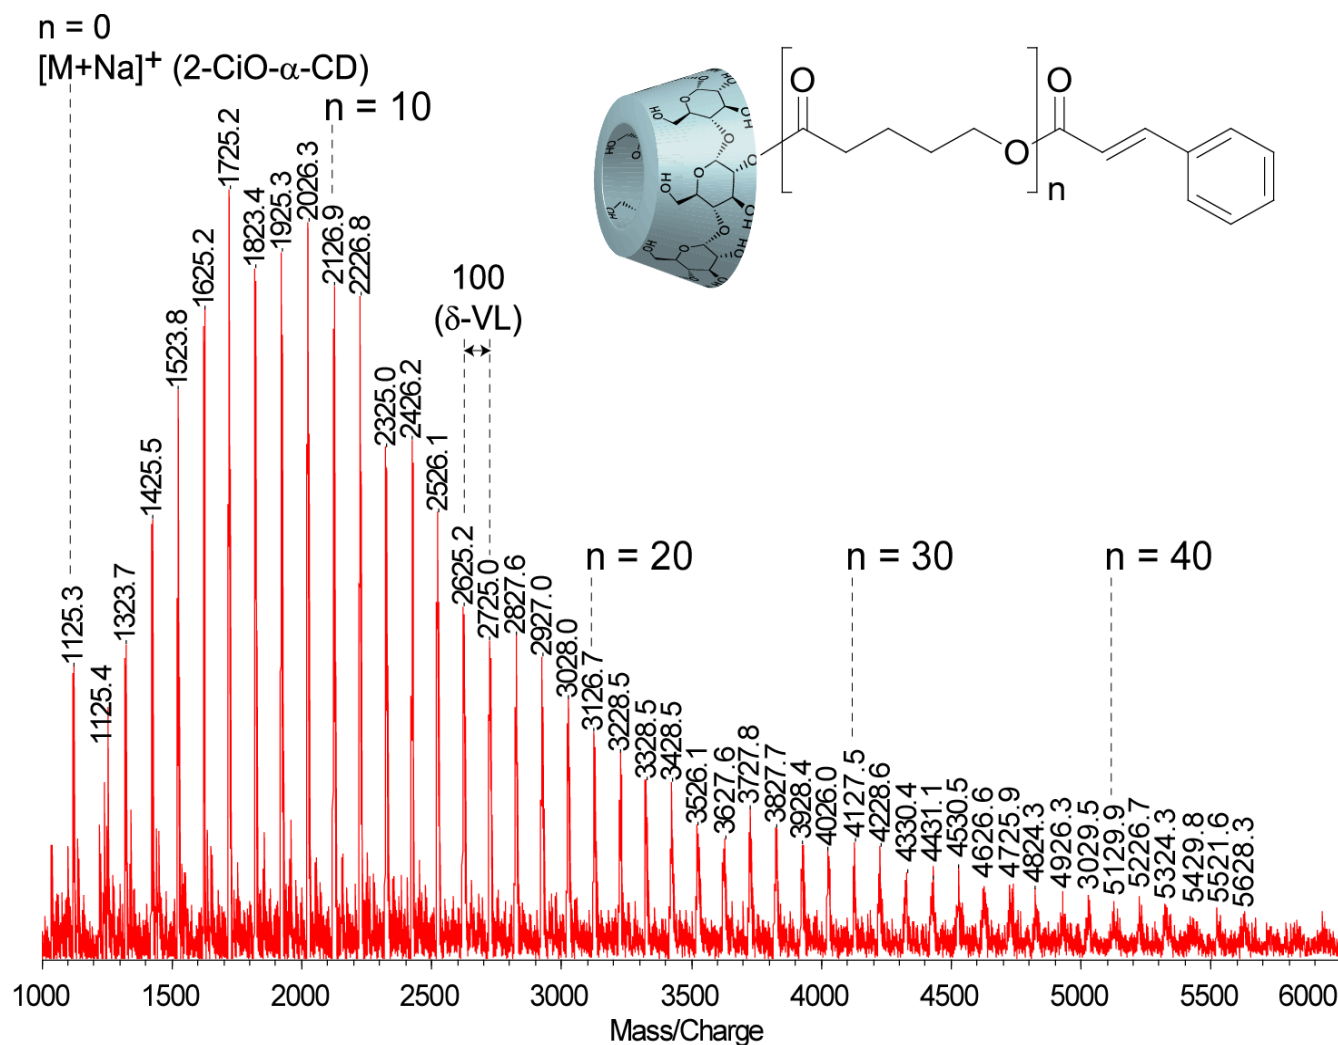

**Figure S2.** MALDI-TOF mass spectrum of the product obtained from the polymerization of  $\delta$ -VL initiated by 2-*trans*-CiO- $\alpha$ -CD.

The spectrum of the product showed that each signal appears at intervals of 100 ( $\delta$ -VL monomer unit) from the signal of 2-*trans*-CiO- $\alpha$ -CD, indicating that each polymer is covalently linked with 2-*trans*-CiO- $\alpha$ -CD.

The results of  $^1\text{H}$  NMR (Figure S1) and MALDI-TOF mass spectrum (Figure S2) support that poly( $\delta$ -VL) chain was inserted into the ester bond between  $\alpha$ -CD and cinnamoyl group, and single poly( $\delta$ -VL) chain propagated from the ester bond at  $C_2$ -position of  $\alpha$ -CD.
